# Supplementary material for: A Mitochondrial Specific Antioxidant Reverses Metabolic Dysfunction and Fatty Liver Induced by Maternal Cigarette Smoke in Mice
Source: PubMed Central journal article supplement (PMC6682890; doi:10.3390/nu11071669), 2019-07-21
Supplement: nutrients-11-01669-s001.pdf [file nutrients-11-01669-s001.pdf]

**Table S1.** TaqMan Probe sequence (Life Technologies, CA, USA) used for rt-PCR.

| Gene          | NCBI References | Probe Sequence            | ID            |
|---------------|-----------------|---------------------------|---------------|
| <i>ACTA2</i>  | NM_007392.3     | TAGCCCTGGCCTAGCAACACTGATT | Mm00725412_s1 |
| <i>ATGL</i>   | NM_025802.3     | CCAAGACTGAATGGCTGGATGGCAA | Mm00503040_m1 |
| <i>COL1A1</i> | NM_007742.3     | AGTCTACATGTCTAGGGTCTAGACA | Mm00801666_g1 |
| <i>CPT1a</i>  | NM_013495.2     | TTCCAGGAGAATGCCAGGAGGTCAT | Mm01231183_m1 |
| <i>FASN</i>   | NM_007988.3     | AGCAATTGTGGATGGAGGTATCAAC | Mm00662319_m1 |
| <i>FOXO1</i>  | NM_019739.3     | TCGCGGGCTGGAAGAATTCAATTC  | Mm00490671_m1 |
| <i>IL1B</i>   | NM_008361.3     | TCCTTGTGCAAGTGTCTGAAGCAGC | Mm01336189_m1 |
| <i>PCK1</i>   | NM_011044.2     | CCGTAGACCTGAAGGTGTCCCCTT  | Mm01247058_m1 |
| <i>PGC1a</i>  | NR_027710.1     | CTGGAAGTGCAGGCCTAACTCCTCC | Mm01208835_m1 |
| <i>PFK</i>    | NM_008826.4     | GCGGTGATGCGCAAGGTATGAATGC | Mm00435587_m1 |
| <i>PPAR-γ</i> | NM_0011273330.1 | ATGCTGTTATGGGTGAAACTCTGG  | Mm01184322_m1 |
| <i>SLC2A1</i> | NM_011400.3     | CATCGCCCTGGCCTTGCTGGAACGG | Mm00441480_m1 |
| <i>SLC2A2</i> | NM_031197.2     | CCGCTCCCCCGCGCGCACACACC   | Mm00446229_m1 |
| <i>SLC2A4</i> | NM_009204.2     | TGGCTCTGCTGCTGCTGGAACGGT  | Mm00436615_m1 |
| <i>TNFα</i>   | NM_013693.2     | CCCTCACACTCAGATCATCTTCTCA | Mm00443259_g1 |

*Acta2*:  $\alpha$ -smooth muscle actin, *Atgl*: Adipose triglyceride lipase, *Cd68*: Cluster of differentiation 68, *Cpt1a*: Carnitine palmitoyltransferase 1a, *Fasn*: Fatty acid synthase, *Foxo1*: Forkhead box protein O1, *Pgc1a*: Peroxisome proliferator-activated receptor gamma coactivator 1- $\alpha$ , *Pck1*: Phosphoenolpyruvate carboxykinase 1, *Ppar-γ*: Peroxisome proliferator-activated receptor gamma, *Pfk*: Phosphofructokinase, SE: cigarette smoke exposure, SE+MQ: SE with MitoQ supplementation, *Slc2a1*: Glut1, *Slc2a2*: Glut2, *Slc2a4*: Glut4, *Tnfα*: Tumor necrosis factor- $\alpha$ .

**Table S2.** Lipid species in the liver detected by lipidomics analysis.

| RT (min) | Identification | Sham Intensity (cps) | SE Intensity (cps) | SE+MQ Intensity (cps) |
|----------|----------------|----------------------|--------------------|-----------------------|
| 13.191   | PE 36:5        | 4748±1345            | 5524±1085          | 5834±835              |
| 13.359   | PE 38:7        | 93671±12543          | 161508±39763       | 91261±11121           |
| 13.847   | PE 40:8        | 42933±8000           | 65586±16331        | 49017±5949            |
| 13.855   | PE 36:5        | 50681±8323           | 95868±25379        | 48692±6984            |
| 13.855   | PE 38:8        | 3921±617             | 7600±1921          | 4520±644              |
| 14.15    | PE 34:3        | 21528±4301           | 33784±7186         | 21459±2996            |
| 14.192   | PE 38:7        | 18933±3512           | 31311±7458         | 22078±3079            |
| 14.226   | PE 37:6        | 12163±2852           | 16650±3625         | 15457±2265            |
| 14.495   | PE 38:8        | 10385±1851           | 13684±2959         | 11249±1591            |
| 14.522   | PE 39:7        | 32430±5655           | 49481±10664        | 44258±5233            |
| 14.53    | PE 40:7        | 3727±339             | 5966±1318          | 4811±819              |
| 14.604   | PE 36:4        | 63487±14994          | 85918±18161        | 67706±7782            |
| 14.629   | PE 38:6        | 178755±35163         | 300132±74613       | 184502±21694          |
| 14.705   | PE 34:3        | 23789±9463           | 22096±2078         | 29859±3641            |
| 15.041   | PE 34:3        | 4766±1050            | 6287±1533          | 5190±665              |
| 15.148   | PE-NMe2 38:6   | 57240±14340          | 61935±14019        | 53637±8398            |
| 15.215   | PE 35:3        | 2159±563             | 2898±597           | 2288±221              |
| 15.369   | PE 38:6        | 4694148±713042       | 6099049±982543     | 5619157±736726        |
| 15.377   | PE 40:9        | 227368±27913         | 169240±24766       | 202810±36130          |
| 15.503   | PE 42:10       | 64210±9180           | 55613±8582         | 62573±11614           |
| 15.522   | PE 40:7        | 1333445±295460       | 1899879±341033     | 1498967±183253        |
| 15.654   | PE 32:1        | 13533±2019           | 26077±5536         | 14686±2265            |
| 15.915   | PE-NMe2 34:2   | 5878±1238            | 10478±2709         | 6670±806              |
| 15.996   | PE 40:8        | 84216±14709          | 98276±14505        | 83927±10770           |
| 16.017   | PE 39:6        | 9570±1516            | 17099±3625         | 14245±1853            |
| 16.051   | PS 40:6        | 782327±174683        | 693019±160100      | 683561±102890         |
| 16.124   | PE 34:2        | 734740±152746        | 855722±170424      | 762476±84106          |
| 16.287   | PE 36:3        | 444326±99436         | 589139±128140      | 469697±49028          |
| 16.302   | PE 38:6        | 24721±4917           | 25200±3944         | 22791±2676            |
| 16.445   | PE 39:6        | 58586±14526          | 69779±14877        | 68037±10619           |
| 16.663   | PE 33:1        | 1700±216             | 2843±510           | 2521±325              |

|        |                   |                 |                 |                  |
|--------|-------------------|-----------------|-----------------|------------------|
| 16.665 | PE 36:3           | 54091±9900      | 86536±17012     | 65324±7676       |
| 16.705 | PE 40:8           | 12774±2625      | 14941±2787      | 14120±2118       |
| 16.814 | PE 40:6           | 14647±2268      | 19705±3870      | 14784±1709       |
| 16.827 | PE 40:7           | 2962±432        | 5226±1147       | 3564±334         |
| 16.828 | PE 38:4           | 39291±7762      | 63841±18540     | 35658±4058       |
| 16.91  | PE 39:7           | 4990±766        | 5080±634        | 5437±897         |
| 16.981 | PS 36:2           | 15169±6297      | 13674±3983      | 9675±2478        |
| 17.036 | PI 38:3           | 60653±13052     | 66282±14537     | 55600±5942       |
| 17.19  | PE 35:2           | 24727±5411      | 20516±3955      | 23755±3986       |
| 17.292 | PE 36:3           | 5024±942        | 6784±1564       | 4945±553         |
| 17.439 | PA 34:1           | 9671±2688       | 9476±2536       | 5726±1157        |
| 17.486 | PE 40:6           | 2225961±388150  | 2113916±383568  | 1962195±288930   |
| 17.493 | PE 42:9           | 132729±18044    | 102633±14093    | 129702±25499     |
| 17.621 | PE 34:1           | 121270±8910     | 203223±29207*   | 169945±18992     |
| 17.845 | PE 40:7           | 292044±43221    | 240169±32748    | 261743±38716     |
| 17.886 | PE-NMe2 36:2      | 5692±1199       | 5647±1077       | 5463±627         |
| 17.89  | PE 40:5           | 88238±6974      | 156020±25363*   | 103893±15011     |
| 18.013 | PE 36:2           | 460362±99622    | 610928±109655   | 573191±83595     |
| 18.182 | PE 41:6           | 22791±4829      | 21557±3433      | 23453±4001       |
| 18.257 | PE 35:1           | 6859±2220       | 6509±868        | 6961±1131        |
| 18.282 | PE 40:5           | 23876±6341      | 27674±4359      | 24190±3495       |
| 18.287 | PE 38:3           | 114568±22675    | 170374±24083    | 129407±16706     |
| 18.289 | PE 40:6           | 16013±2832      | 19184±2866      | 17891±2417       |
| 18.522 | PE 37:2           | 9584±2043       | 8466±1211       | 9572±1399        |
| 18.541 | PE 40:4           | 17766±4039      | 23240±4281      | 19575±2725       |
| 18.668 | PE 38:2           | 12464±2378      | 23058±4678*     | 12675±1193#      |
| 18.687 | PE 36:1           | 64954±9634      | 93258±14868     | 82146±11525      |
| 18.891 | PE 38:2           | 19272±1728      | 21991±2886      | 20370±1697       |
| 19.034 | PE 40:3           | 2209±320        | 3227±645        | 2564±390         |
| 19.231 | PE 38:1           | 13103±1581      | 21703±3003*     | 17024±1922       |
| 19.236 | PE 40:2           | 2940±1066       | 3198±1338       | 3253±761         |
| 20.153 | TG 18:3_18:3_18:3 | 15344±2221      | 43898±19091     | 39434±8783       |
| 20.361 | TG 42:0           | 9675±1220       | 6140±1829       | 8758±1481        |
| 20.372 | TG 14:0_16:0_18:3 | 169454±46336    | 374367±140958   | 841122±549469    |
| 20.437 | TG 16:0_18:3_18:2 | 1387906±307583  | 2552634±775373  | 3976208±1928056  |
| 20.711 | TG 16:0_18:2_18:1 | 8074384±1610661 | 9438356±2154155 | 10861013±3147549 |
| 20.826 | TG 54:3           | 4092231±481959  | 7124186±2264960 | 8524145±2820249  |
| 20.835 | TG 52:2           | 7229942±1500714 | 7174353±848949  | 7261535±1493622  |
| 20.856 | TG 18:2_18:1_20:1 | 653822±69556    | 924291±212524   | 1232330±257067   |
| 20.967 | TG 18:1_18:1_20:1 | 1031411±142735  | 1767167±556538  | 1984807±772490   |
| 21.17  | TG 52:0           | 24053±4113      | 55860±19912     | 29831±11212      |
| 21.215 | TG 18:1_18:1_21:0 | 21682±5595      | 40896±15747     | 39038±18587      |
| 21.297 | TG 18:1_18:1_24:1 | 44775±10731     | 65446±20602     | 69983±29349      |

Data are expressed as mean ± SEM (n=3-5). \*P<0.05 vs Sham. #P<0.05 vs SE. PA: phosphatidic acid, PE: phosphatidylethanolamine, PI: phosphatidylinositol, PS: phosphatidylserine, SE: cigarette smoke exposure, SE+MQ: SE with MitoQ supplementation, TG: triglyceride.
